# Supplementary figures and images for: Genome-Wide Detection for Runs of Homozygosity in Baoshan Pigs Using Whole Genome Resequencing
Source: MDPI journal article supplement (doi:10.3390/genes15020233), 2024-02-12

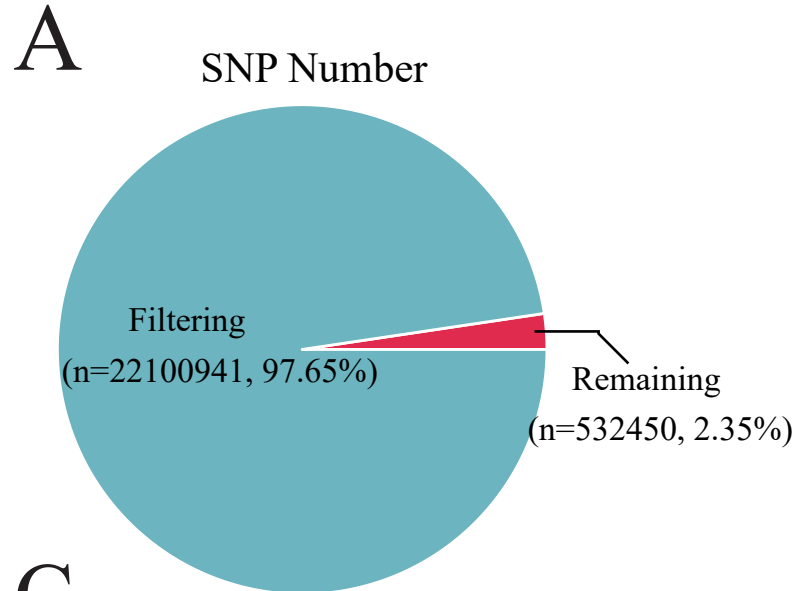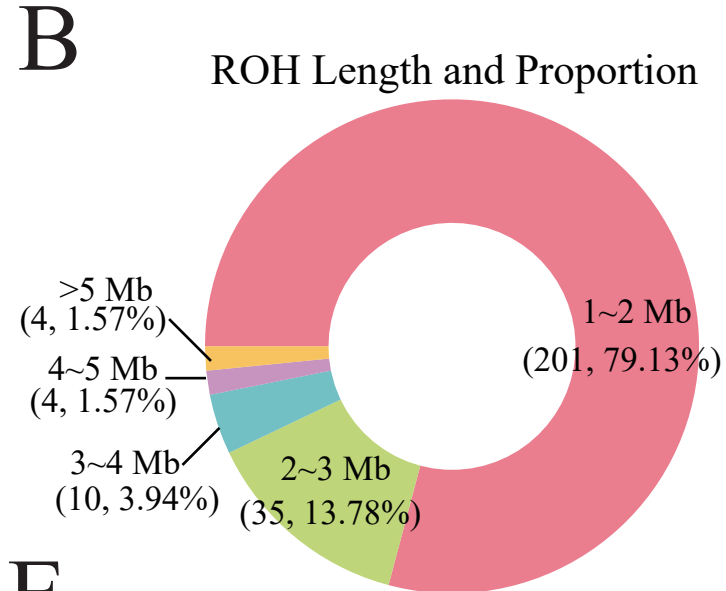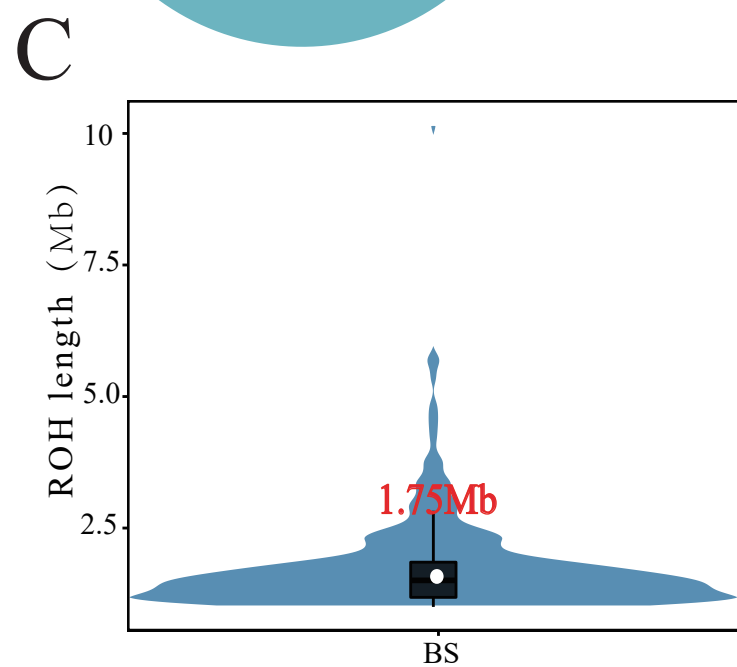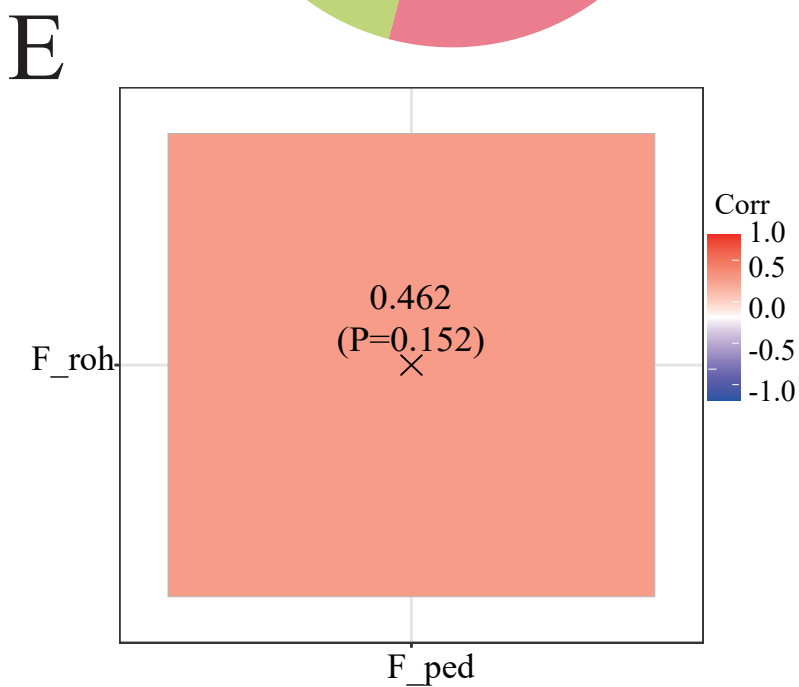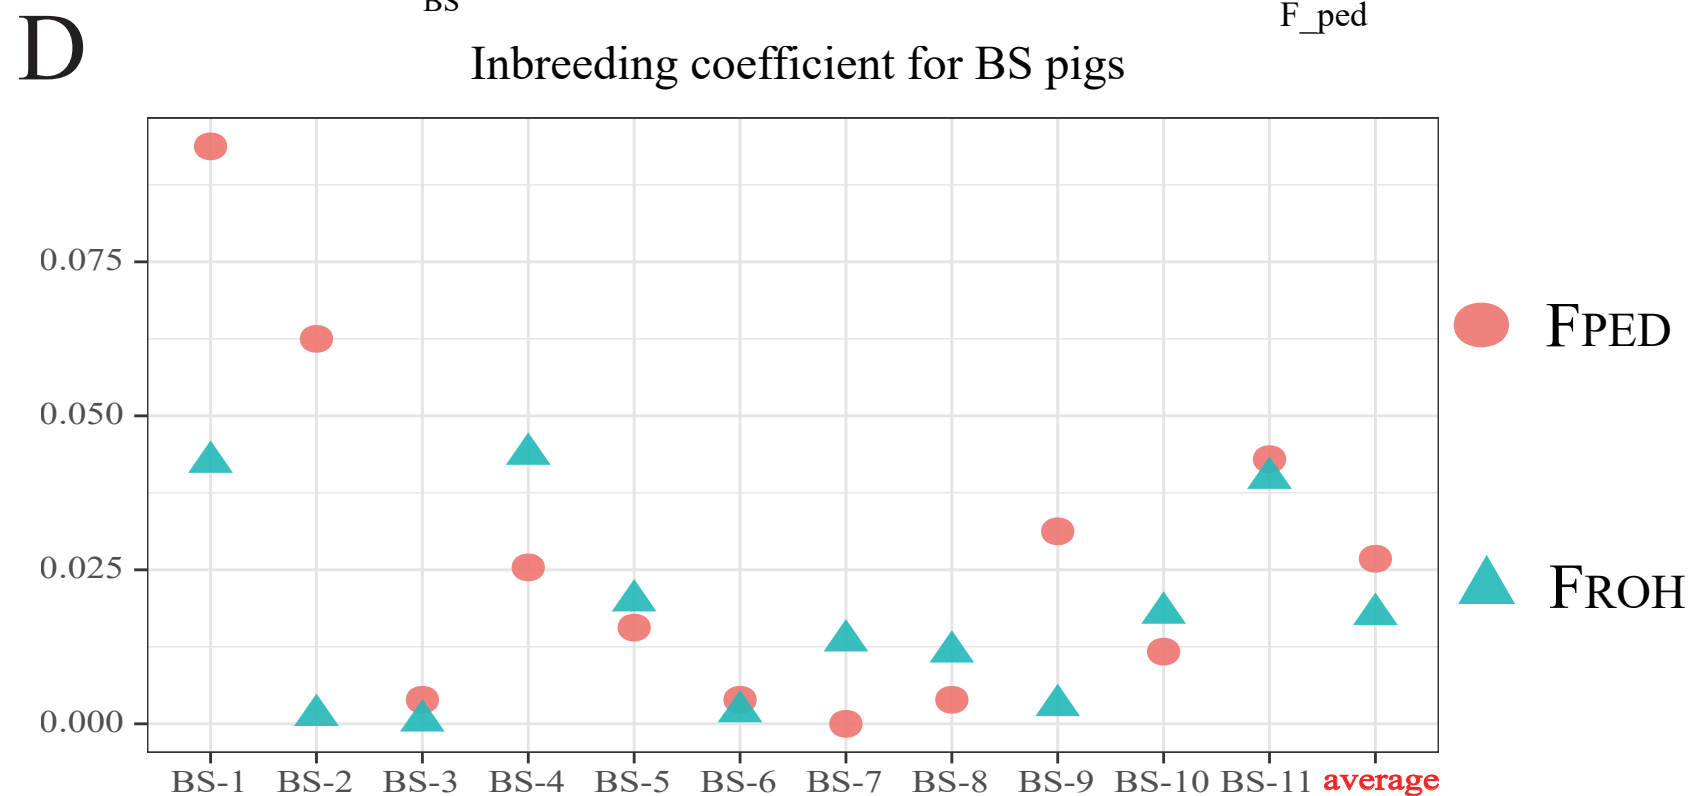

Supplement: s1 [file s1]
